# Supplementary material
Source: Springer Nature journal article supplement (https://www.springermedizin.de/resource/supplementary/12985_2011_1295_MOESM5_ESM.pdf/9609482)

**(A)**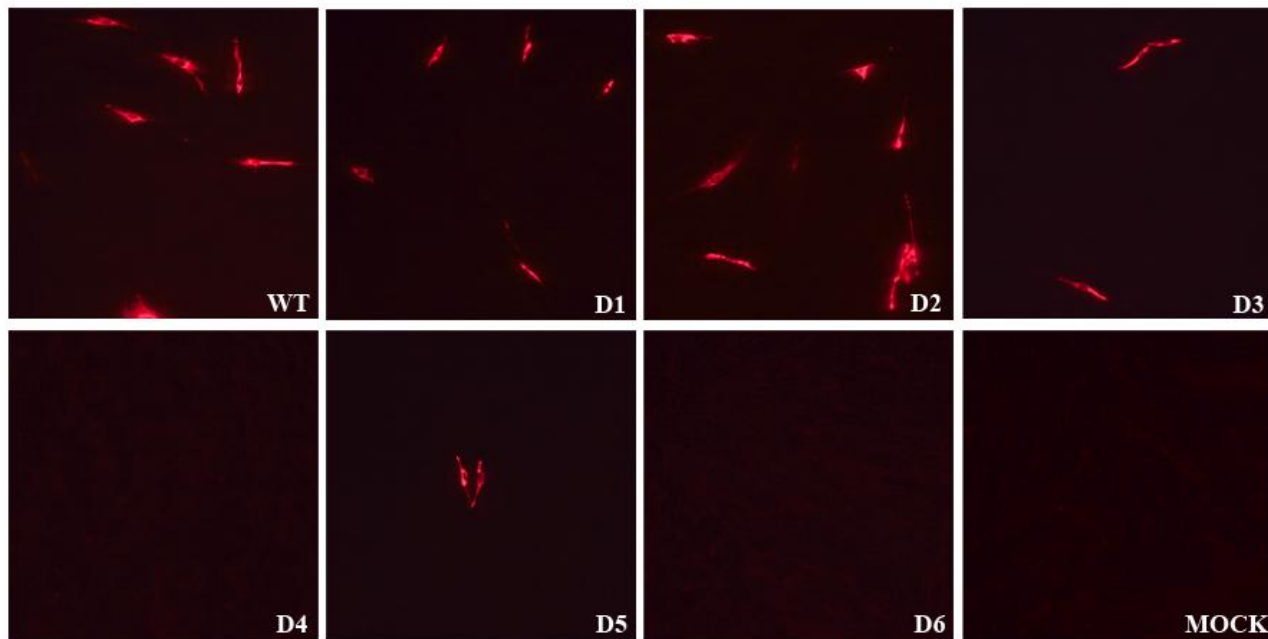**(B)****(i)**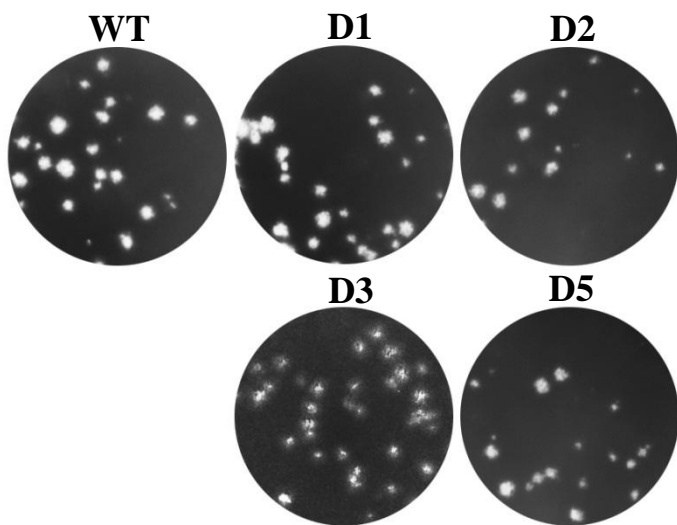**(ii)**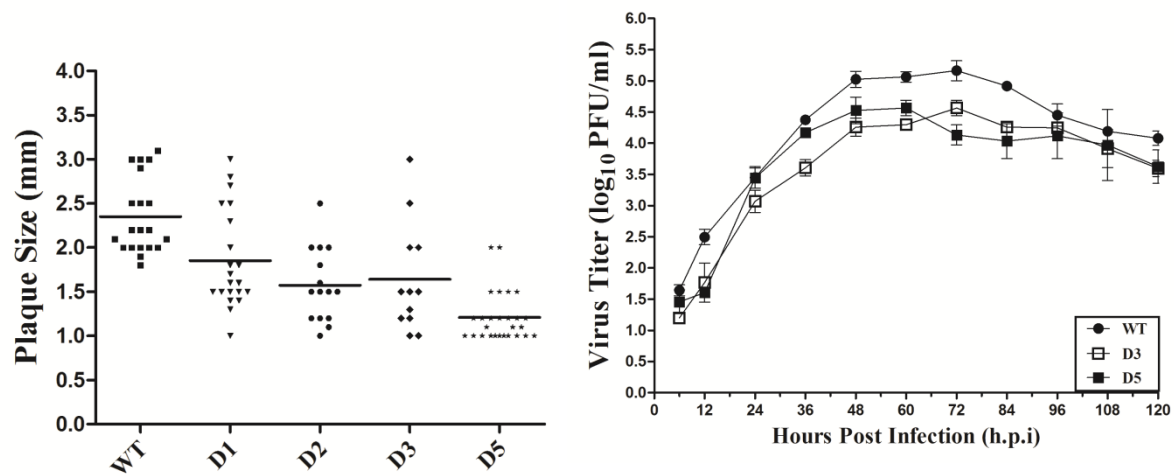

Supplement: MOESM5 [file 9609482]
